# Supplementary material for: Next-generation plasmids for transgenesis in zebrafish and beyond
Source: PubMed Central journal article supplement (PMC10263156; doi:10.1242/dev.201531), 2023-04-19
Supplement: develop-150-201531-s1.pdf [file develop-150-201531-s1.pdf]

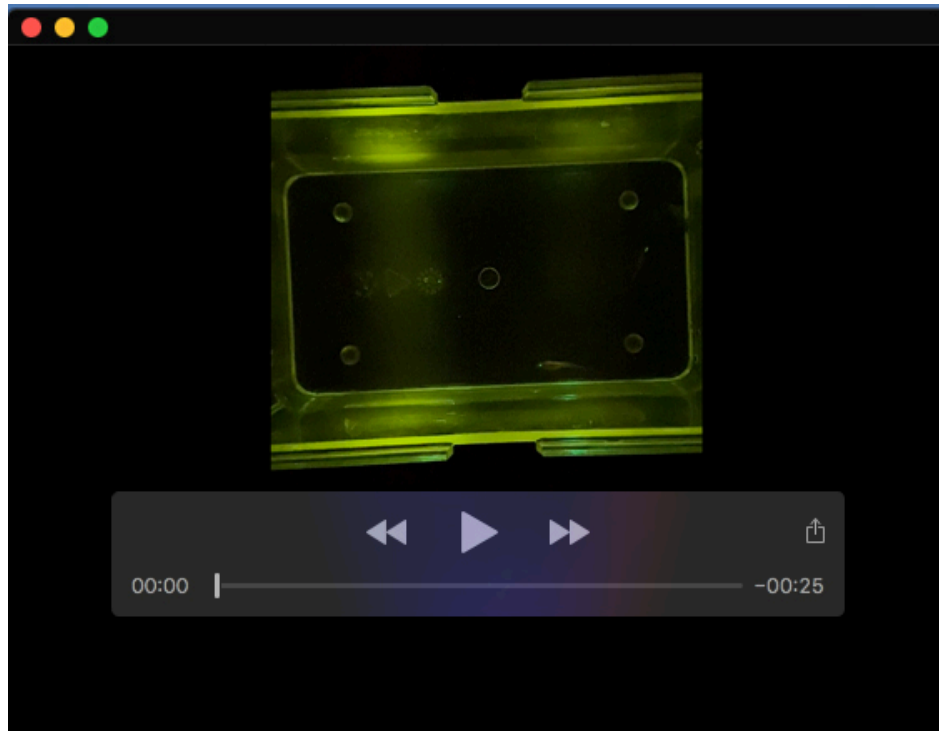

**Movie 1.** Adult *exorh:EGFP*-transgenic zebrafish observed using a NightSEA hand-held UV flashlight and UV filter glasses (“goggles”), demonstrating the persistent pineal gland expression of the reporter and the simple detection.
